# Supplementary material
Source: PubMed Central journal article supplement (PMC8933619)
Supplement: NIHMS1723052-supplement-Supplementary_Materials__figures__tables.pdf [file NIHMS1723052-supplement-Supplementary_Materials__figures__tables.pdf]

# **Amygdala functional connectivity mediates the association between catastrophizing and threat-safety learning in youth with chronic pain**

**Running title: Amygdala rsFC, catastrophizing and threat learning**

Inge Timmers<sup>1\*</sup>, Marina López-Solà<sup>2</sup>, Lauren C Heathcote<sup>1</sup>, Marissa Heirich<sup>1</sup>, Gillian Q Rush<sup>1</sup>, Deborah Shear<sup>1</sup>, David Borsook<sup>3</sup>, Laura E Simons<sup>1</sup>

<sup>1</sup> Department of Anesthesiology, Perioperative, and Pain Medicine, Stanford University School of Medicine, Palo Alto, CA 94304, United States

<sup>2</sup> Serra Hunter Program, Unit of Psychological Medicine, Department of Medicine, School of Medicine and Clinical Sciences, University of Barcelona, 08007 Barcelona, Spain

<sup>3</sup> Center for Pain and the Brain, Boston Children's Hospital, Center for Pain and the Brain, Boston, MA 02115, United States

**\* Corresponding author:** Inge Timmers, PhD. Department of Anesthesiology, Perioperative, and Pain Medicine, Stanford University School of Medicine, 1070 Arastradero Road, Suite 300, Palo Alto, CA 94304, United States. Email: itimmers@stanford.edu

**SUPPLEMENTARY INFORMATION**

**SUPPLEMENTARY RESULTS****Participants****Table S1:** Participant characteristics of the sample included in analyses

|                                                    | <b>Patients<br/>Mean (SE)</b> | <b>Controls<br/>Mean (SE)</b> | <b>Statistics comparing the two<br/>groups</b> |
|----------------------------------------------------|-------------------------------|-------------------------------|------------------------------------------------|
| <b>n</b>                                           | 46                            | 29                            |                                                |
| <b>Sex</b>                                         |                               |                               | $\chi^2(1, n=75) = 4.74, p = .03$              |
| <i>male</i>                                        | 3                             | 8                             |                                                |
| <i>female</i>                                      | 43                            | 21                            |                                                |
| <b>Age</b>                                         | 15.83 (0.35)                  | 15.69 (0.69)                  | $t(73) = -0.20, p = .85$                       |
| <b>Pain Details</b>                                |                               |                               |                                                |
| <i>Pain Type</i>                                   | <i>n (%)</i>                  | <i>n/a</i>                    |                                                |
| Neuropathic                                        | 10 (21.7%)                    |                               |                                                |
| Musculoskeletal                                    | 27 (58.7%)                    |                               |                                                |
| Visceral                                           | 9 (19.6%)                     |                               |                                                |
| <i>Pain Duration</i>                               | 35.98 (6.18)                  | <i>n/a</i>                    |                                                |
| <i>Pain Intensity</i>                              | 6.13 (.24)                    | 1.62 (0.29)                   | $t(73) = -11.82, p < .001$                     |
| <b>Alertness Ratings</b>                           |                               |                               |                                                |
| <i>Alertness Before RS</i>                         | 7.26 (0.31)                   | 6.75 (0.39)                   | $t(68) = -1.04, p = .30$                       |
| <i>Alertness After RS</i>                          | 6.67 (0.30)                   | 6.48 (0.31)                   | $t(72) = -.41, p = .68$                        |
| <b>Self-Report</b>                                 |                               |                               |                                                |
| STAI-T                                             | 16.26 (1.19)                  | 9.24 (1.25)                   | $t(73) = -3.89, p < .001$                      |
| FDI                                                | 17.76 (1.70)                  | 1.41 (0.46)                   | $t(73) = -7.50, p < .001$                      |
| PCS                                                | 21.28 (1.48)                  | 8.70 (1.19)                   | $t(73) = -6.03, p < .001$                      |
| <i>low PCS (<math>\leq 14</math>)*</i>             | 24 %                          | 86 %                          |                                                |
| <i>moderate PCS (15-25)*</i>                       | 45 %                          | 14 %                          |                                                |
| <i>high PCS (<math>\geq 26</math>)*</i>            | 31 %                          | 0 %                           |                                                |
| <b>Post-Acquisition Ratings</b>                    |                               |                               |                                                |
| <i>Fear rating CS+</i>                             | 5.49 (0.34)                   | 5.03 (0.39)                   | $t(73) = -.87, p = .39$                        |
| <i>Fear rating CS-</i>                             | 2.60 (0.22)                   | 2.48 (0.26)                   | $t(73) = -.34, p = .74$                        |
| <i>Differential fear rating<br/>    CS+&gt;CS-</i> | 2.89 (0.42)                   | 2.55 (0.48)                   | $t(73) = -.52, p = .60$                        |

\* Clinical reference points as proposed by Pielich *et al.* [1]. SE = standard error; RS = resting state; STAI-T = State-Trait Anxiety Inventory for Children – Trait version; FDI = Functional Disability Index; PCS = Pain Catastrophizing Scale; CS+ = conditioned stimulus paired with aversive stimulus (threat stimulus); CS- = conditioned stimulus never paired with aversive stimulus (safe stimulus)

### MRI data - comparing left and right amygdala seeds

Differences in rsFC profiles were inspected by directly contrasting left and right amygdala seeds. Several clusters survived initial cluster-defining threshold (CDT) of  $p < .001$ , and subsequent cluster-extent based FDR correction of  $p$  (cluster  $p$ -FDR)  $< .05$ . In brief, left amygdala rsFC was more pronounced overall, and was stronger compared to right amygdala rsFC to regions including frontal pole and frontal and central opercular regions. Right amygdala rsFC was stronger compared to left amygdala rsFC to regions including frontal pole, supramarginal and angular gyrus.

### Contrasting amygdala rsFC across patients and controls

**Table S2:** Left amygdala rsFC separate for patients. Presented are anatomical locations, corresponding MNI coordinates, cluster size  $k$  and max (peak) statistic of the clusters. The clusters coincide with those visually presented in **Figure 3A** in the main text. Clusters are extracted using cluster defining threshold  $p < .001$  and subsequent cluster-extent FDR-correction. Anatomical locations are derived from Harvard Oxford atlases.  $FDRc$  = cluster size threshold of  $FDR-p < .05$ .

| Anatomical Location                                                                                  | x   | y   | z   | k                              | max stat |
|------------------------------------------------------------------------------------------------------|-----|-----|-----|--------------------------------|----------|
| <b>Positive rsFC</b>                                                                                 |     |     |     | <b><math>FDRc</math></b>       |          |
|                                                                                                      |     |     |     | <b><math>k &gt; 131</math></b> |          |
| <i>Frontal lobe</i>                                                                                  |     |     |     |                                |          |
| bilateral frontal medial cortex                                                                      | 6   | 44  | -16 | 661                            | 6.86     |
| right orbitofrontal cortex                                                                           | 30  | 32  | -16 | 181                            | 5.67     |
| right frontal pole                                                                                   | 4   | 60  | 20  | 483                            | 5.36     |
| left precentral gyrus / supplementary motor area                                                     | -6  | -18 | 48  | 142                            | 4.4      |
| left precentral gyrus ( <i>more medial</i> )                                                         | -14 | -22 | 68  | 243                            | 4.19     |
| <i>Subcortical regions</i>                                                                           |     |     |     |                                |          |
| bilateral amygdala, extending to hippocampus, putamen, pallidum, insula, precentral, temporal cortex | -24 | -4  | -22 | 21204                          | 27.1     |
| <i>Other</i>                                                                                         |     |     |     |                                |          |
| right cerebellum, posterior lobe                                                                     | 18  | -70 | -42 | 131                            | 4.27     |
| <b>Negative rsFC</b>                                                                                 |     |     |     | <b><math>FDRc</math></b>       |          |
|                                                                                                      |     |     |     | <b><math>k &gt; 70</math></b>  |          |
| <i>Frontal lobe</i>                                                                                  |     |     |     |                                |          |
| left frontal pole                                                                                    | -26 | 60  | -6  | 237                            | 4.41     |

|                                                                            |     |     |     |      |      |
|----------------------------------------------------------------------------|-----|-----|-----|------|------|
| right frontal pole                                                         | 22  | 62  | -6  | 479  | 6.28 |
| left middle frontal gyrus                                                  | -38 | 24  | 44  | 379  | 5.54 |
| left middle frontal gyrus ( <i>more posterior</i> )                        | -30 | 8   | 56  | 371  | 6.29 |
| right middle frontal gyrus                                                 | 40  | 26  | 36  | 1836 | 6.13 |
| right paracingulate / superior frontal gyrus                               | 6   | 20  | 44  | 166  | 4.22 |
| right paracingulate gyrus                                                  | 10  | 32  | 26  | 70   | 4.05 |
| <i>Parietal lobe</i>                                                       |     |     |     |      |      |
| right supramarginal gyrus, anterior and posterior division / angular gyrus | 52  | -40 | 48  | 2260 | 6.4  |
| left supramarginal gyrus, posterior division / angular gyrus               | -44 | -48 | 38  | 1206 | 6.29 |
| bilateral precuneus                                                        | 6   | -66 | 48  | 3015 | 6.93 |
| cingulate gyrus, posterior division                                        | 6   | -30 | 44  | 498  | 4.39 |
| <i>Occipital lobe</i>                                                      |     |     |     |      |      |
| left lingual gyrus                                                         | -24 | -64 | 0   | 121  | 4.79 |
| right lingual gyrus / occipital fusiform gyrus                             | 24  | -70 | 0   | 151  | 4.77 |
| <i>Other</i>                                                               |     |     |     |      |      |
| brainstem                                                                  | 22  | -28 | -42 | 99   | 4.74 |
| left cerebellum                                                            | -48 | -66 | -50 | 377  | 6.01 |
| left cerebral white matter                                                 | -20 | -12 | 32  | 183  | 6.09 |
| right cerebral white matter                                                | 18  | -22 | 30  | 156  | 5.54 |

**Table S3:** Left amygdala rsFC separate for controls. Presented are anatomical locations, corresponding MNI coordinates, cluster size  $k$  and max (peak) statistic of the clusters. The clusters coincide with those visually presented in **Figure 3B** in the main text. Clusters are extracted using cluster defining threshold  $p < .001$  and subsequent cluster-extent FDR-correction. Anatomical locations are derived from Harvard Oxford atlases.  $FDRc$  = cluster size threshold of  $FDR-p < .05$ .

| Anatomical Location                                                                              | x  | y  | z  | k                             | max stat |
|--------------------------------------------------------------------------------------------------|----|----|----|-------------------------------|----------|
| <b>Positive rsFC</b>                                                                             |    |    |    | <b><math>FDRc</math></b>      |          |
|                                                                                                  |    |    |    | <b><math>k &gt; 76</math></b> |          |
| <i>Frontal lobe</i>                                                                              |    |    |    |                               |          |
| left frontal pole                                                                                | -6 | 54 | 44 | 457                           | 5.64     |
| bilateral cingulate gyrus, anterior division                                                     | -2 | 30 | 2  | 114                           | 4.36     |
| bilateral cingulate gyrus, anterior division ( <i>mid-cingulate</i> ) / supplementary motor area | 0  | 0  | 42 | 1627                          | 6.16     |
| right inferior frontal gyrus, pars triangularis                                                  | 48 | 30 | 8  | 133                           | 4.65     |

|                                                                                                      |     |     |     |                                    |       |
|------------------------------------------------------------------------------------------------------|-----|-----|-----|------------------------------------|-------|
| left precentral gyrus                                                                                | -42 | -12 | 54  | 217                                | 4.79  |
| <i>Occipital cortex</i>                                                                              |     |     |     |                                    |       |
| left lateral occipital cortex, superior division                                                     | -30 | -76 | 54  | 104                                | 4.87  |
| <i>Subcortical regions</i>                                                                           |     |     |     |                                    |       |
| bilateral amygdala, extending to hippocampus, putamen, pallidum, insula, precentral, temporal cortex | -24 | -4  | -22 | 34265                              | 34.99 |
| <i>Other</i>                                                                                         |     |     |     |                                    |       |
| brainstem                                                                                            | -6  | -36 | -48 | 85                                 | 4.29  |
| brainstem / cerebellum                                                                               | 10  | -48 | -40 | 477                                | 5.56  |
| cerebellum                                                                                           | 12  | -58 | -22 | 76                                 | 4.86  |
| <b>Negative rsFC</b>                                                                                 |     |     |     | <b>FDR<sub>c</sub><br/>k&gt;86</b> |       |
| <i>Frontal lobe</i>                                                                                  |     |     |     |                                    |       |
| left frontal pole                                                                                    | -26 | 62  | 2   | 679                                | 5.34  |
| right frontal pole                                                                                   | 24  | 48  | 26  | 86                                 | 3.82  |
| left middle frontal gyrus                                                                            | -36 | 14  | 42  | 687                                | 5.65  |
| right middle frontal gyrus                                                                           | 40  | 18  | 48  | 4083                               | 6.5   |
| <i>Parietal lobe</i>                                                                                 |     |     |     |                                    |       |
| left supramarginal gyrus, anterior and posterior division / angular gyrus                            | -44 | -48 | 36  | 4586                               | 6.51  |
| right supramarginal gyrus, posterior division / angular gyrus                                        | 52  | -46 | 38  | 1533                               | 7.65  |
| <i>Temporal lobe</i>                                                                                 |     |     |     |                                    |       |
| left inferior temporal gyrus, posterior division                                                     | -48 | -30 | -16 | 140                                | 4.4   |
| right inferior temporal gyrus, posterior division                                                    | 52  | -34 | -16 | 107                                | 4.75  |
| <i>Occipital lobe</i>                                                                                |     |     |     |                                    |       |
| left intracalcerine / lateral occipital cortex                                                       | -26 | -66 | 8   | 311                                | 4.89  |
| <i>Other</i>                                                                                         |     |     |     |                                    |       |
| left cerebellum                                                                                      | -48 | -54 | -48 | 548                                | 6.32  |
| left cerebral white matter                                                                           | -20 | -24 | 26  | 176                                | 4.68  |
| left cerebral white matter                                                                           | -24 | -48 | 26  | 88                                 | 4.19  |
| right cerebral white matter                                                                          | 36  | -42 | 0   | 370                                | 4.84  |
| right cerebral white matter                                                                          | 34  | -24 | 36  | 159                                | 4.55  |

**Table S4:** Right amygdala rsFC separate for patients. Presented are anatomical locations, corresponding MNI coordinates, cluster size  $k$  and max (peak) statistic of the clusters. The clusters coincide with those visually presented in **Figure 3A**. Clusters are extracted using cluster defining threshold  $p < .001$  and subsequent cluster-extent FDR-correction. Anatomical locations are derived from Harvard Oxford atlases.  $FDRc$  = cluster size threshold of  $FDR-p < .05$ .

| Anatomical Location                                                                                  | x   | y   | z   | k                                                    | max stat |
|------------------------------------------------------------------------------------------------------|-----|-----|-----|------------------------------------------------------|----------|
| <b>Positive rsFC</b>                                                                                 |     |     |     | <b><math>FDRc</math><br/><math>k &gt; 142</math></b> |          |
| <i>Frontal lobe</i>                                                                                  |     |     |     |                                                      |          |
| bilateral frontal pole                                                                               | 4   | 60  | 20  | 595                                                  | 5.95     |
| bilateral frontal medial cortex                                                                      | 6   | 48  | -16 | 754                                                  | 5.91     |
| <i>Subcortical regions</i>                                                                           |     |     |     |                                                      |          |
| bilateral amygdala, extending to hippocampus, putamen, pallidum, insula, precentral, temporal cortex | 24  | -6  | -18 | 22421                                                | 28.76    |
| <i>Other</i>                                                                                         |     |     |     |                                                      |          |
| cerebellum / brainstem                                                                               | 12  | -46 | -40 | 142                                                  | 4.4      |
| <b>Negative rsFC</b>                                                                                 |     |     |     | <b><math>FDRc</math><br/><math>k &gt; 107</math></b> |          |
| <i>Frontal lobe</i>                                                                                  |     |     |     |                                                      |          |
| left frontal pole                                                                                    | -24 | 56  | -4  | 859                                                  | 5.5      |
| right frontal pole                                                                                   | 24  | 60  | -16 | 305                                                  | 5.48     |
| left middle frontal gyrus                                                                            | -30 | 8   | 56  | 497                                                  | 5.44     |
| left middle frontal gyrus (more inferior)                                                            | -42 | 18  | 38  | 388                                                  | 4.62     |
| right middle frontal gyrus                                                                           | 40  | 24  | 42  | 320                                                  | 4.06     |
| right superior frontal gyrus                                                                         | 18  | 18  | 56  | 592                                                  | 4.47     |
| <i>Parietal lobe</i>                                                                                 |     |     |     |                                                      |          |
| left angular gyrus / supramarginal gyrus, posterior division                                         | -48 | -52 | 42  | 1184                                                 | 6.7      |
| right supramarginal gyrus, posterior division / angular gyrus                                        | 48  | -42 | 54  | 1093                                                 | 6.25     |
| bilateral precuneous cortex                                                                          | -8  | -64 | 32  | 2332                                                 | 6.48     |
| bilateral cingulate gyrus, posterior division                                                        | 4   | -30 | 24  | 596                                                  | 5.16     |
| <i>Occipital lobe</i>                                                                                |     |     |     |                                                      |          |
| right lingual gyrus / occipital fusiform gyrus                                                       | 22  | -64 | -10 | 222                                                  | 4.08     |
| <i>Other</i>                                                                                         |     |     |     |                                                      |          |
| left cerebellum                                                                                      | -48 | -64 | -52 | 246                                                  | 4.69     |
| left cerebellum (more superior)                                                                      | -38 | -58 | -34 | 107                                                  | 4.57     |

**Table S5:** Right amygdala rsFC separate for controls. Presented are anatomical locations, corresponding MNI coordinates, cluster size  $k$  and max (peak) statistic of the clusters. The clusters coincide with those visually presented in **Figure 3B**. Clusters are extracted using cluster defining threshold  $p < .001$  and subsequent cluster-extent FDR-correction. Anatomical locations are derived from Harvard Oxford atlases.  $FDR_c$  = cluster size threshold of  $FDR-p < .05$ .

| Anatomical Location                                                                                  | x   | y   | z   | k                                                    | max stat |
|------------------------------------------------------------------------------------------------------|-----|-----|-----|------------------------------------------------------|----------|
| <b>Positive rsFC</b>                                                                                 |     |     |     | <b><math>FDR_c</math><br/><math>k &gt; 83</math></b> |          |
| <i>Frontal lobe</i>                                                                                  |     |     |     |                                                      |          |
| right inferior frontal gyrus, pars triangularis                                                      | 48  | 30  | 12  | 176                                                  | 5.16     |
| bilateral supplementary motor area / cingulate gyrus, anterior division                              | 10  | 0   | 62  | 1323                                                 | 5.45     |
| <i>Temporal lobe</i>                                                                                 |     |     |     |                                                      |          |
| left planum temporale / parietal operculum                                                           | -38 | -36 | 14  | 83                                                   | 4.31     |
| <i>Subcortical regions</i>                                                                           |     |     |     |                                                      |          |
| bilateral amygdala, extending to hippocampus, putamen, pallidum, insula, precentral, temporal cortex | 24  | -4  | -18 | 35928                                                | 37.03    |
| <b>Negative rsFC</b>                                                                                 |     |     |     | <b><math>FDR_c</math><br/><math>k &gt; 78</math></b> |          |
| <i>Frontal lobe</i>                                                                                  |     |     |     |                                                      |          |
| left frontal pole                                                                                    | -24 | 62  | 2   | 1396                                                 | 6.93     |
| right frontal pole                                                                                   | 16  | 54  | -16 | 664                                                  | 4.98     |
| left middle frontal gyrus                                                                            | -36 | 14  | 42  | 676                                                  | 5.74     |
| right middle frontal gyrus                                                                           | 40  | 20  | 42  | 172                                                  | 4.16     |
| bilateral superior frontal gyrus / paracingulate gyrus                                               | -2  | 24  | 54  | 1199                                                 | 5.38     |
| left inferior frontal gyrus, pars opercularis                                                        | -50 | 14  | 6   | 87                                                   | 4.1      |
| bilateral cingulate gyrus, anterior / posterior division                                             | 6   | -12 | 30  | 122                                                  | 4.33     |
| <i>Parietal lobe</i>                                                                                 |     |     |     |                                                      |          |
| left precuneous cortex / angular gyrus / supramarginal gyrus, posterior division                     | -6  | -64 | 48  | 4599                                                 | 7.3      |
| right supramarginal gyrus, posterior division / angular gyrus                                        | 52  | -42 | 38  | 530                                                  | 5.49     |
| <i>Temporal lobe</i>                                                                                 |     |     |     |                                                      |          |
| left middle temporal gyrus, posterior division                                                       | -44 | -34 | -12 | 182                                                  | 4.48     |
| <i>Occipital lobe</i>                                                                                |     |     |     |                                                      |          |
| right occipital fusiform gyrus                                                                       | 24  | -76 | 0   | 202                                                  | 5.22     |
| Subcortical regions                                                                                  |     |     |     |                                                      |          |

|                                           |     |     |     |     |      |
|-------------------------------------------|-----|-----|-----|-----|------|
| right hippocampus / cerebral white matter | 36  | -42 | 0   | 78  | 5.55 |
| <i>Other</i>                              |     |     |     |     |      |
| left cerebellum                           | -44 | -58 | -52 | 378 | 5.74 |
| right cerebellum                          | 28  | -82 | -52 | 876 | 5.66 |
| left cerebral white matter                | -24 | -24 | 26  | 304 | 5.65 |
| right cerebral white matter               | 34  | -24 | 36  | 285 | 5.38 |

**Table S6:** Group differences in left amygdala rsFC. Presented are anatomical locations, corresponding MNI coordinates, cluster size  $k$  and max (peak) statistic of the clusters. The clusters coincide with those visually presented in **Figure 3C** in the main text. Clusters are extracted using cluster defining threshold  $p < .001$  and subsequent cluster-extent FDR-correction. Anatomical locations are derived from Harvard Oxford atlases.  $FDRc$  = cluster size threshold of  $FDR-p < .05$ .

| Anatomical Location                          | x  | y   | z  | k                     | max stat |
|----------------------------------------------|----|-----|----|-----------------------|----------|
| <b>patients &gt; controls</b>                |    |     |    | <b><i>FDRc</i></b>    |          |
|                                              |    |     |    | <b><i>k&gt;76</i></b> |          |
| <i>Parietal lobe</i>                         |    |     |    |                       |          |
| right supramarginal gyrus, anterior division | 64 | -28 | 48 | 133                   | 4.18     |
| <b>controls &gt; patients</b>                |    |     |    |                       |          |
| <i>no significant clusters</i>               |    |     |    |                       |          |

### Relation between pain catastrophizing and threat-safety learning (total effect - path c)

The two experimental CS ratings of anxiousness and unpleasantness were combined into one ‘fear’ rating. When taking the ratings separately, similar correlations were observed. In patients, there was also a moderate, positive correlation between pain catastrophizing and self-reported differential anxiousness ( $CS+ > CS-$ ;  $r_p = .53$ ,  $p < .001$ ), and between pain catastrophizing and self-reported differential unpleasantness ( $CS+ > CS-$ ;  $r_p = .35$ ,  $p = .02$ ) (**Figure S1**), with elevated pain catastrophizing being associated with increased differential fear (i.e., the total effect, path c). In controls, these correlations were not significant.



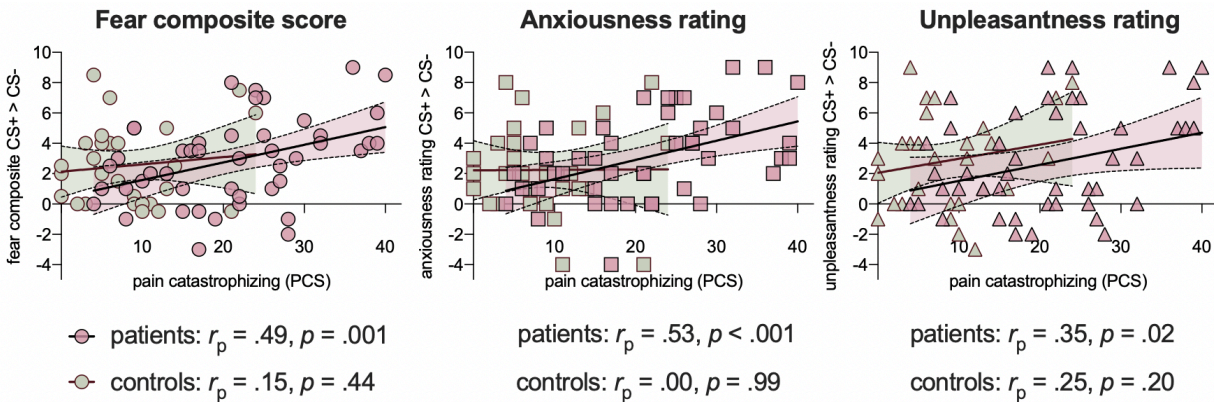

**Figure S1.** Association between pain catastrophizing and either the composite or separate indices of threat-safety learning (path c) in patients with chronic pain (pink) and controls (green). In patients, all three indices show a positive, moderate correlation with differential threat-safety learning indices. In controls, these associations were not significant.

#### Relation between pain catastrophizing and amygdala rsFC (path a)

**Table S7:** Left amygdala rsFC in relation to pain catastrophizing (X-M, path a). Presented are anatomical locations, corresponding MNI coordinates, cluster size  $k$  and max (peak) statistic of the clusters. While only clusters are included that survive  $p < .001$ , clusters were extracted using the thresholds  $p < .05$  and  $k > 50$  for visualization purposes (the clusters reflect those visually presented in **Figure 5** in the main text). Anatomical locations are derived from Harvard Oxford atlases.

| Anatomical Location                                | x   | y   | z   | k    | max stat |
|----------------------------------------------------|-----|-----|-----|------|----------|
| <b>Positive Correlations</b>                       |     |     |     |      |          |
| <i>Frontal lobe</i>                                |     |     |     |      |          |
| left frontal pole / orbital cortex                 | -24 | 42  | -12 | 202  | 8.28     |
| right frontal pole                                 | 8   | 68  | 0   | 213  | 10.57    |
| left middle frontal gyrus                          | -34 | 12  | 38  | 60   | 7.64     |
| right superior frontal gyrus / paracingulate gyrus | 6   | 24  | 48  | 141  | 7.87     |
| bilateral precentral gyrus                         | 4   | -24 | 68  | 1051 | 10.64    |
| <i>Parietal lobe</i>                               |     |     |     |      |          |
| right parietal operculum                           | 32  | -28 | 20  | 66   | 7.62     |
| right angular gyrus                                | 34  | -56 | 32  | 50   | 7.96     |

|                                                                                 |     |     |     |      |       |
|---------------------------------------------------------------------------------|-----|-----|-----|------|-------|
| <i>Temporal lobe</i>                                                            |     |     |     |      |       |
| left temporal pole                                                              | -34 | 10  | -38 | 126  | 8.46  |
| right temporal fusiform cortex                                                  | -38 | -14 | -32 | 105  | 6.93  |
| <i>Occipital lobe</i>                                                           |     |     |     |      |       |
| right lateral occipital cortex, superior division                               | 44  | -70 | 34  | 303  | 8.3   |
| right occipital pole                                                            | 16  | -96 | -22 | 54   | 7.42  |
| <i>Subcortical regions</i>                                                      |     |     |     |      |       |
| left amygdala / hippocampus / putamen                                           | -20 | -6  | -18 | 424  | 10.73 |
| bilateral caudate / thalamus                                                    | 0   | 6   | 6   | 768  | 9.34  |
| right thalamus                                                                  | 4   | -24 | 4   | 131  | 7.02  |
| <i>Other</i>                                                                    |     |     |     |      |       |
| brainstem                                                                       | 4   | -40 | -66 | 82   | 8.21  |
| left cerebellum, anterior lobe                                                  | -4  | -44 | -28 | 253  | 7.97  |
| right cerebral white matter                                                     | 42  | -36 | -4  | 75   | 7.02  |
| <b>Negative Correlations</b>                                                    |     |     |     |      |       |
| <i>Frontal lobe</i>                                                             |     |     |     |      |       |
| left frontal pole                                                               | -22 | 48  | 22  | 870  | 7.04  |
| right frontal pole                                                              | 28  | 58  | -18 | 57   | 7.2   |
| bilateral paracingulate gyrus                                                   | 14  | 32  | 30  | 1873 | 8.22  |
| <i>Parietal lobe</i>                                                            |     |     |     |      |       |
| left supramarginal gyrus, anterior and posterior division / parietal operculum  | -56 | -34 | 38  | 943  | 7.98  |
| right supramarginal gyrus, anterior and posterior division / parietal operculum | 58  | -32 | 34  | 1537 | 8.43  |
| left precuneous cortex                                                          | -16 | -66 | 24  | 63   | 7.71  |
| right precuneous cortex                                                         | 10  | -64 | 22  | 67   | 7.46  |
| <i>Temporal lobe</i>                                                            |     |     |     |      |       |
| left middle temporal gyrus, superior division                                   | -56 | -24 | -8  | 91   | 6.93  |
| <i>Occipital lobe</i>                                                           |     |     |     |      |       |
| right cuneal cortex                                                             | 12  | -84 | 22  | 225  | 7.17  |
| <i>Subcortical regions</i>                                                      |     |     |     |      |       |
| right putamen                                                                   | 34  | 6   | 0   | 161  | 7.79  |
| <i>Other</i>                                                                    |     |     |     |      |       |
| left cerebellum, anterior lobe                                                  | -18 | -58 | -20 | 480  | 7.66  |
| left cerebellum                                                                 | -18 | -70 | -56 | 93   | 7.05  |
| right cerebellum                                                                | 24  | -62 | -60 | 146  | 8.23  |
| right cerebellum, posterior lobe                                                | 16  | -68 | -20 | 609  | 7.94  |
| right cerebellum, posterior lobe                                                | 34  | -80 | -26 | 139  | 7.1   |
| right cerebellum, posterior lobe                                                | 32  | -80 | -42 | 129  | 7.18  |
| right cerebellum, posterior lobe                                                | 50  | -50 | -38 | 73   | 6.95  |

**Relation between amygdala rsFC and threat-safety learning (path *b*)**

**Table S8:** Left amygdala rsFC in relation to threat-safety learning, while controlling for pain catastrophizing (M-Y, path *b*). Presented are anatomical locations, corresponding MNI coordinates, cluster size *k* and max (peak) statistic of the clusters. While only clusters are included that survive  $p < .001$ , clusters were extracted using the thresholds  $p < .05$  and  $k > 50$  for visualization purposes (the clusters reflect those visually presented in **Figure 6** in the main text). Anatomical locations are derived from Harvard Oxford atlases.

| Anatomical Location                                                  | x   | y   | z   | k     | max stat |
|----------------------------------------------------------------------|-----|-----|-----|-------|----------|
| <b>Positive Correlations</b>                                         |     |     |     |       |          |
| <i>Frontal lobe</i>                                                  |     |     |     |       |          |
| left frontal pole / frontal orbital cortex                           | -20 | 36  | -10 | 149   | 7.01     |
| right frontal pole                                                   | 36  | 50  | -14 | 260   | 6.95     |
| right inferior frontal gyrus, pars opercularis and pars triangularis | 50  | 26  | 10  | 1112  | 7.65     |
| <i>Parietal lobe</i>                                                 |     |     |     |       |          |
| right postcentral / precentral gyrus                                 | 40  | -24 | 50  | 341   | 7.09     |
| <i>Temporal lobe</i>                                                 |     |     |     |       |          |
| left middle temporal gyrus, temporooccipital part                    | -62 | -50 | 0   | 175   | 8.04     |
| right middle temporal gyrus, temporooccipital part                   | 60  | -40 | 2   | 271   | 7.88     |
| <i>Occipital lobe</i>                                                |     |     |     |       |          |
| right lateral occipital cortex, inferior division                    | 30  | -86 | -2  | 1015  | 7.3      |
| <i>Subcortical regions</i>                                           |     |     |     |       |          |
| right thalamus                                                       | 6   | -24 | 16  | 167   | 8.18     |
| <i>Other</i>                                                         |     |     |     |       |          |
| left cerebral white matter                                           | -24 | -38 | 8   | 53    | 8.46     |
| <b>Negative Correlations</b>                                         |     |     |     |       |          |
| <i>Frontal lobe</i>                                                  |     |     |     |       |          |
| left frontal pole                                                    | -38 | 44  | 22  | 211   | 7.9      |
| right superior frontal gyrus                                         | 10  | 4   | 70  | 103   | 7.57     |
| cingulate gyrus, anterior division / paracingulate gyrus             | -2  | 38  | 22  | 2989  | 13.21    |
| subcallosal cortex                                                   | 0   | 10  | -14 | 51    | 11.58    |
| <i>Parietal lobe</i>                                                 |     |     |     |       |          |
| right postcentral gyrus                                              | 14  | -38 | 58  | 718   | 13       |
| right parietal operculum / supramarginal gyrus, anterior division    | 52  | -26 | 28  | 167   | 10.95    |
| left angular gyrus                                                   | -48 | -58 | 22  | 480   | 9.11     |
| bilateral precuneous / supracalcarine cortex                         | 0   | -60 | 10  | 10490 | 11.95    |

|                                                     |     |     |     |      |       |
|-----------------------------------------------------|-----|-----|-----|------|-------|
| <i>Temporal lobe</i>                                |     |     |     |      |       |
| right temporal pole                                 | 52  | 12  | -38 | 56   | 8.7   |
| left inferior temporal gyrus, temporooccipital part | -48 | -46 | -30 | 75   | 8.16  |
| <i>Occipital lobe</i>                               |     |     |     |      |       |
| right lateral occipital cortex, superior division   | 46  | -76 | 20  | 252  | 9.97  |
| <i>Subcortical regions</i>                          |     |     |     |      |       |
| left thalamus                                       | -16 | -8  | 14  | 93   | 9.26  |
| left thalamus ( <i>more ventral</i> )               | -18 | -22 | -2  | 90   | 7.19  |
| left putamen / pallidum                             | -24 | -2  | -2  | 88   | 8.64  |
| <i>Other</i>                                        |     |     |     |      |       |
| cerebellum                                          | -4  | -52 | -48 | 1386 | 10.66 |

### Brain mediators of the relation between pain catastrophizing and threat-safety learning (indirect effect - path $a \times b$ )

**Table S9:** Left amygdala circuit mediators of relation between pain catastrophizing and threat-safety learning (path X-M-Y). Presented are anatomical locations, corresponding MNI coordinates, cluster size  $k$  and max (peak) statistic of the clusters. While only clusters are included that survive  $p < .001$ , clusters were extracted using the thresholds  $p < .05$  and  $k > 50$  for visualization purposes (the clusters reflect those visually presented in **Figure 7** in the main text). Anatomical locations are derived from Harvard Oxford atlases.

| Anatomical Location                                               | x  | y   | z   | k   | max stat |
|-------------------------------------------------------------------|----|-----|-----|-----|----------|
| <b>Positive Mediation</b>                                         |    |     |     |     |          |
| <i>Parietal lobe</i>                                              |    |     |     |     |          |
| right supramarginal gyrus, anterior division / parietal operculum | 54 | -26 | 30  | 109 | 7.71     |
| <i>Other</i>                                                      |    |     |     |     |          |
| brainstem                                                         | 12 | -46 | -48 | 67  | 8.06     |
| <b>Negative Mediation</b>                                         |    |     |     |     |          |
| <i>no significant clusters</i>                                    |    |     |     |     |          |

Post-hoc, we evaluated whether amygdala-SMG rsFC would also mediate the relation between pain catastrophizing and the separate indices of threat-safety learning (i.e., anxiousness and unpleasantness). **Figure S2** shows the findings remain significant and are similar in strength.

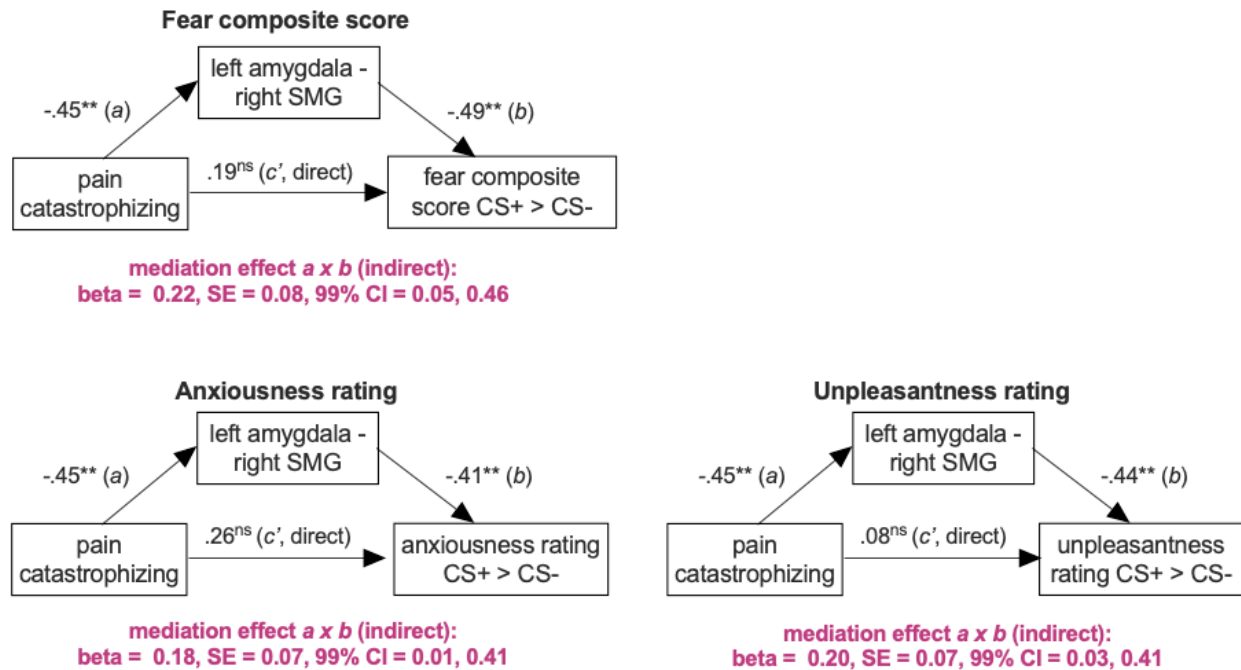

**Figure S2.** The path diagrams and standardized coefficients for all three outcome models (fear composite score, anxiousness rating and unpleasantness rating) are presented for descriptive purposes, as calculated offline (post-hoc).

### Comparing key constructs across the different pain types

We inspected whether the key constructs in this study differed across patients with neuropathic, musculoskeletal or visceral pain using a one-way ANOVA. No main effects of group were observed in pain catastrophizing ( $F_{2,43} = 1.10, p = .34$ ), differential fear ratings ( $F_{2,43} = 0.76, p = .48$ ), amygdala-SMG group difference cluster rsFC ( $F_{2,43} = 1.82, p = .18$ ) or amygdala-SMG/PO brain mediator cluster rsFC ( $F_{2,43} = 0.86, p = .43$ ).

### Comparing the group difference and brain mediator clusters

First, there was a moderate correlation between amygdala rsFC with the group difference SMG cluster and brain mediator SMG/PO cluster in patients ( $r = .48, p = .001$ ), which was similar in controls ( $r = .47, p = .01$ ). Second, while amygdala rsFC with the group difference SMG cluster differed between patients and controls (see manuscript), amygdala rsFC with the brain mediator

SMG/PO cluster did not ( $F_{1,73} = 2.38, p = .13$ ). Third, while amygdala rsFC with both clusters correlated with pain catastrophizing in the patient group, the correlation was stronger for the brain mediator SMG/PO cluster (group difference amygdala-SMG cluster:  $r = -.33, p = .03$ ; brain mediator SMG/PO cluster:  $r = -.46, p = .001$ ). Fourth, while amygdala rsFC with the brain mediator SMG/PO cluster correlated with threat-safety discrimination indices (differential fear CS+>CS-:  $r = -.58, p < .001$ ), amygdala rsFC with the group difference SMG cluster did not ( $r = -.14, p = .37$ ).

## REFERENCE

- [1] Pielech M, Ryan M, Logan D, Kaczynski K, White MT, Simons LE. Pain catastrophizing in children with chronic pain and their parents: proposed clinical reference points and reexamination of the Pain Catastrophizing Scale measure. *Pain* 2014;155(11):2360-2367.
